# Supplementary material
Source: HighWire-hosted journal article supplement (http://www.cmaj.ca/highwire/filestream/60063/field_highwire_adjunct_files/8/161020-res-5-at.pdf)
Supplement: 161020-res-5-at.pdf [file 161020-res-5-at.pdf]

**Appendix 5 (as supplied by the authors): Risk of spontaneous abortion associated with the use of antibiotics during pregnancy, by individual drugs, using exposure to penicillins or cephalosporins as the reference category<sup>++</sup>.**

| Exposure                            | no (%) of cases | Adjusted* OR (95% CI) | Adjusted** OR (95% CI) |
|-------------------------------------|-----------------|-----------------------|------------------------|
| Type of individual antibiotics      |                 |                       |                        |
| Type of Cephalosporins              |                 |                       | 1.00                   |
| Cephalexin                          | 9(0.10%)        | 0.96 (0.38-2.44)      |                        |
| other cephalosporins                | 48(0.55%)       | 1.03(0.76-1.39)       |                        |
| Combined use of ≥ 2 cephalosporins  | 3(0.03%)        | 2.17(0.65-7.20)       |                        |
| Type of Penicillins                 |                 | 1.00                  |                        |
| Amoxicillin                         | 257 (2.95%)     |                       | 0.75(0.56-1.00)        |
| Amoxicillin/ potassium clavulanate  | 7 (0.08%)       |                       | 1.75 (0.75-4.07)       |
| Phenoxymethylpenicilline (peni V)   | 74 (0.85%)      |                       | 1.34 (0.93-1.94)       |
| Otherpenicillins                    | 117 (1.34%)     |                       | 1.31(0.94-1.82)        |
| Combined use of ≥ 2 penicillin      | 45 (0.52%)      |                       | 1.48(0.98-2.22)        |
| Type of Macrolides                  |                 |                       |                        |
| Azithromycin                        | 110(1.26%)      | 1.91(1.53-2.39)       | 1.83(1.30-2.56)        |
| Clarithromycin                      | 111 (1.28%)     | 2.73 (2.16-3.44)      | 2.61 (1.85-3.66)       |
| Erythromycin                        | 29 (0.33%)      | 0.82 (0.56-1.19)      | 0.78 (0.50-1.23)       |
| Other macrolides                    | 7 (0.08%)       | 2.28 (0.99-5.23)      | 2.19 (0.91-5.24)       |
| Combined use of ≥ 2 macrolides      | 7 (0.08%)       | 2.20 (0.98-4.94)      | 2.10 (0.90-4.92)       |
| Type of Quinolones                  |                 |                       |                        |
| Ciprofloxacin                       | 114(1.31%)      | 2.85(2.26-3.59)       | 2.72 (1.93-3.85)       |
| Norfloxacin                         | 8 (0.09%)       | 5.58 (2.37-13.16)     | 5.34 (2.19-13.02)      |
| levofloxacin                        | 14(0.16%)       | 3.81 (1.99-7.28)      | 3.65 (1.82-7.32)       |
| Other quinolone                     | 23(0.26%)       | 4.91 (2.99-8.06)      | 4.70 (2.69-8.19)       |
| Combined use of ≥ 2 quinolones      | 1(0.01%)        | 1.07 (0.12-9.20)      | 1.02 (0.12-8.93)       |
| Type of tetracyclines               |                 |                       |                        |
| Doxycycline                         | 36 (0.41%)      | 3.27 (2.22-4.82)      | 3.13 (1.97-4.96)       |
| Minocycline                         | 21(0.24%)       | 2.89 (1.77-4.69)      | 2.76 (1.60-4.76)       |
| Other tetracyclines                 | 9(0.10%)        | 2.30 (1.10-4.79)      | 2.20(1.01-4.77)        |
| Combined use of ≥ 2 tetracycline    | 1 (0.01%)       | NA                    | NA                     |
| Types of other antibacterials drugs |                 |                       |                        |
| Clindamycin                         | 34 (0.39%)      | 1.48(1.02-2.14)       | 1.42 (0.91-2.21)       |
| Type of Antiprotozoals drugs        |                 |                       |                        |
| Metronidazole                       | 53(0.61%)       | 1.97 (1.45-2.67)      | 1.88(1.27-2.80)        |
| Type of Urinary anti-infectives     |                 |                       |                        |
| Nitrofurantoin                      | 39(0.45%)       | 0.81 (0.58-1.13)      | 0.77 (0.51-1.17)       |

Note: 95%CI, 95% confidence interval; OR, odds ratio; NA, not applicable.

<sup>\*\*</sup>Adjusted for the following variables: maternal age on the first day of gestation, maternal marital status (living alone or cohabiting), receipt of social assistance during pregnancy, education level in years ( $\leq 12$  or  $> 12$ ), and area of residence on the first day of gestation (urban or rural); maternal chronic co-morbidities assessed using physician-based diagnoses or filled prescriptions of related medications in the year before and during pregnancy until index date (chronic hypertension, depression, diabetes mellitus, asthma, epilepsy, polyarthritis rheumatoid and systemic lupus erythematosus, thyroid disorders); Uterine malformations and endometriosis assessed using physician-based diagnoses; Maternal infections assessed using physician-based diagnoses in the year before and during pregnancy until index date (urinary tract infection, respiratory tract infection, bacterial vaginosis, and sexually transmitted diseases); Other anti-infective agents assessed also in the year before and during pregnancy until index date; Use of health services in the year before pregnancy; and history of planned and spontaneous abortion.

\*reference: penicillin.

\*\* reference: cephalosporin;
